# Supplementary material for: Enhanced Corrosion Resistance of Carbon Steel in Hydrochloric Acid Solution by Polyoxometalate-Estertin Derivatives
Source: PubMed Central journal article supplement — ACS Omega. 2022 Jan 25;7(5):4429–43. doi: 10.1021/acsomega.1c06276 (PMC8829858; doi:10.1021/acsomega.1c06276), 2022-01-25
Supplement: ao1c06276_si_001.pdf [file ao1c06276_si_001.pdf]

# Supporting Information

## Enhanced corrosion resistance of carbon steel in hydrochloric acid solution by polyoxometalate-esterin derivatives

Xing-Fang Wang<sup>1</sup> #, Xin-Yu Liu<sup>1</sup> #, Fang Su<sup>1</sup>, Jian-Sheng Li<sup>1</sup>, Zai-Ming Zhu<sup>1</sup> \*, Xiao-Jing Sang<sup>1</sup> \*, and Lan-Cui Zhang<sup>1</sup> \*

<sup>1</sup> School of Chemistry and Chemical Engineering, Liaoning Normal University, Dalian, 116029, P.R. China.

# Xing-Fang Wang and Xin-Yu Liu are coauthors.

\* Corresponding author.

### CONTENTS

|                                                           |                      |
|-----------------------------------------------------------|----------------------|
| <b>1. Synthesis.....</b>                                  | <b>Pages S2–S3</b>   |
| <b>2. Characterizations.....</b>                          | <b>Pages S3–S8</b>   |
| <b>3. Corrosion Inhibition Performance.....</b>           | <b>Pages S9-S11</b>  |
| <b>4. Adsorption isotherm.....</b>                        | <b>Pages S12</b>     |
| <b>5. Stability analysis of corrosion inhibitors.....</b> | <b>Pages S13-S14</b> |
| <b>References.....</b>                                    | <b>Pages</b>         |
| <b>S15</b>                                                |                      |

## 1. Synthesis

**Na<sub>5</sub>K<sub>5</sub>[(Sn(CH<sub>2</sub>CH<sub>2</sub>COO))<sub>2</sub>(Ni(H<sub>2</sub>O)<sub>3</sub>)<sub>2</sub>(B-β-BiW<sub>9</sub>O<sub>33</sub>)<sub>2</sub>]·20H<sub>2</sub>O (BiW<sub>9</sub>-Ni-SnR).** Parent POM **Na-BiW<sub>9</sub>** (0.288 g, 0.1 mmol), Cl<sub>3</sub>Sn(CH<sub>2</sub>)<sub>2</sub>COOCH<sub>3</sub> (0.062 g, 0.2 mmol) and Ni(NO<sub>3</sub>)<sub>2</sub>·6H<sub>2</sub>O (0.087 g, 0.3 mmol) were dissolved in 10.0 mL of 0.4 M NaAc-HAc buffer solution (pH ≈ 5.0) to form solutions A, B and C, respectively. Then solution B was slowly added to solution A, and stirred at 80 °C for 1 h, and then solution C was added dropwise to the above mixed solution, and stirred for another 2 h. After cooling to room temperature, a certain amount of guanidine hydrochloride (C(NH<sub>2</sub>)<sub>3</sub>Cl) aqueous solution and KCl (s) were added to the obtained solution. Slow evaporation of the aqueous solution at 50 °C resulted in green block crystals (yield: ca. 52.3% based on **Na-BiW<sub>9</sub>**) of **BiW<sub>9</sub>-Ni-SnR** after about four days.

**Na<sub>5</sub>K<sub>5</sub>[(Sn(CH<sub>2</sub>CH<sub>2</sub>COO))<sub>2</sub>(Zn(H<sub>2</sub>O)<sub>3</sub>)<sub>2</sub>(B-β-BiW<sub>9</sub>O<sub>33</sub>)<sub>2</sub>]·21H<sub>2</sub>O (BiW<sub>9</sub>-Zn-SnR).** The synthesis method of **BiW<sub>9</sub>-Zn-SnR** was similar to that of **BiW<sub>9</sub>-Ni-SnR** by replacing Ni(NO<sub>3</sub>)<sub>2</sub>·6H<sub>2</sub>O with ZnCl<sub>2</sub> (0.082 g, 0.6 mmol), and the mass of **Na-BiW<sub>9</sub>** and Cl<sub>3</sub>SnCH<sub>2</sub>CH<sub>2</sub>COOCH<sub>3</sub> were increased to 0.580 g (0.2 mmol) and 0.124 g (0.4 mmol), respectively. Finally, colorless block crystals were obtained (yield: ca. 53.0% based on **Na-BiW<sub>9</sub>**).

### Synthesis of **SbW<sub>9</sub>-TM-SnR** (TM = Mn, Co, Ni, Zn) and **BiW<sub>9</sub>-TM-SnR** (TM = Mn, Co)

These six inorganic-organic hybrid sandwich-type tungstoantimonates/tungstobismuthates, i.e. **SbW<sub>9</sub>-TM-SnR** (TM = Mn, Co, Ni, Zn) and **BiW<sub>9</sub>-TM-SnR** (TM = Mn, Co), were synthesized and characterized according to the methods reported in our previous work.<sup>1,2</sup>

### Discussion on synthesis methods

Two new sandwich-type POMs **BiW<sub>9</sub>-Ni-SnR** and **BiW<sub>9</sub>-Zn-SnR** were obtained with conventional synthesis method (Scheme S1). As shown in Scheme S1, H<sub>2</sub>O was initially selected as a solvent, and the raw materials **Na-BiW<sub>9</sub>**, Cl<sub>3</sub>SnCH<sub>2</sub>CH<sub>2</sub>COOCH<sub>3</sub> and Ni(NO<sub>3</sub>)<sub>2</sub>·6H<sub>2</sub>O were added. As a result, using the "one-pot" synthesis method, the solution became turbid and crystals could not grow. Considering the sensitivity of POMs to pH and our research team's previous experience in the synthesis of such compounds, it may be suitable for crystal growth under a certain acidity environment, so NaAc-HAc buffer solution was chosen as a solvent. In the buffer range of pH = 4–5.5, crystals can successfully grow. Under the same optimum synthetic conditions as those of **BiW<sub>9</sub>-Ni-SnR**, crystalline **BiW<sub>9</sub>-Zn-SnR** with the same polyoxoanion skeleton was obtained by replacing the Ni<sup>2+</sup> salt with ZnCl<sub>2</sub>, and doubling the amount of substance of all reactants.

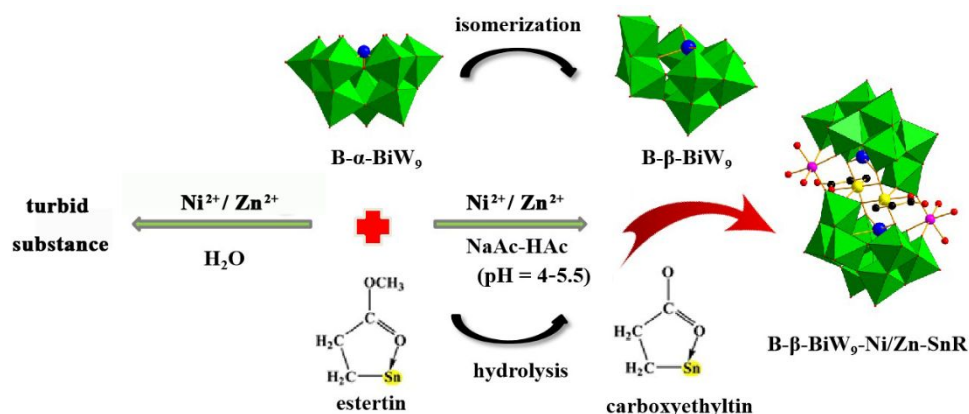

**Scheme S1** The formation process of inhibitors **BiW<sub>9</sub>-Ni-SnR** and **BiW<sub>9</sub>-Zn-SnR**

## 2. CHARACTERIZATION

### 2.1 X-ray crystallography and structural analysis

Using Mo K $\alpha$  ray ( $\lambda = 0.071073$  nm) as the radiation source, the two high-quality crystalline POMs **BiW<sub>9</sub>-Ni-SnR** and **BiW<sub>9</sub>-Zn-SnR** were selected for single crystal X-ray diffraction test, and to collect crystal data on the Bruker smart apex II single crystal diffractometer. Using SHELXTL-2014 crystallographic software,<sup>3</sup> the structures of **BiW<sub>9</sub>-Ni-SnR** and **BiW<sub>9</sub>-Zn-SnR** were solved and refined with direct methods and full-matrix least-squares fitting on  $F^2$ , respectively, and an empirical absorption correction was applied using the SADABS program. All H atoms on C atoms were added according to the calculated positions, and H atoms in H<sub>2</sub>O molecules were directly added in the molecular formulas. Table S1 listed the crystal data and structure refinement of the two POMs. Their selected bond lengths and angles are shown in Tables S2–S3. Their CCDC reference number: 2069049 and 2069050.

**Table S1** Crystal and refinement data for **BiW<sub>9</sub>-Ni-SnR** and **BiW<sub>9</sub>-Zn-SnR**

| Compound       | <b>BiW<sub>9</sub>-Ni-SnR</b>                                                                                                                 | <b>BiW<sub>9</sub>-Zn-SnR</b>                                                                                                                 |
|----------------|-----------------------------------------------------------------------------------------------------------------------------------------------|-----------------------------------------------------------------------------------------------------------------------------------------------|
| Formula        | C <sub>6</sub> H <sub>60</sub> K <sub>5</sub> Na <sub>5</sub> O <sub>96</sub> Bi <sub>2</sub> Ni <sub>2</sub> Sn <sub>2</sub> W <sub>18</sub> | C <sub>6</sub> H <sub>62</sub> K <sub>5</sub> Na <sub>5</sub> O <sub>97</sub> Bi <sub>2</sub> Zn <sub>2</sub> Sn <sub>2</sub> W <sub>18</sub> |
| Formula weight | 6061.05                                                                                                                                       | 6092.38                                                                                                                                       |
| <i>T</i> /K    | 296(2)                                                                                                                                        | 296(2)                                                                                                                                        |
| Wavelength/nm  | 0.071073                                                                                                                                      | 0.071073                                                                                                                                      |
| Crystal system | Triclinic                                                                                                                                     | Triclinic                                                                                                                                     |
| Space group    | <i>P</i> $\bar{1}$                                                                                                                            | <i>P</i> $\bar{1}$                                                                                                                            |
| <i>a</i> /nm   | 1.2391(4)                                                                                                                                     | 1.2394(2)                                                                                                                                     |
| <i>b</i> /nm   | 1.2538(4)                                                                                                                                     | 1.2575(2)                                                                                                                                     |

|                                 |               |              |
|---------------------------------|---------------|--------------|
| $c/\text{nm}$                   | 1.6264(5)     | 1.6329(3)    |
| $\alpha/^\circ$                 | 95.314(5)     | 94.652(3)    |
| $\beta/^\circ$                  | 110.009(5)    | 109.921(3)   |
| $\gamma/^\circ$                 | 101.548(5)    | 101.956(3)   |
| $V/\text{nm}^3, Z$              | 2.2904(11), 1 | 2.3087(7), 1 |
| $D_c/\text{g cm}^{-3}, F_{000}$ | 4.394, 2668   | 4.382, 2682  |
| GOF                             | 1.000         | 1.023        |
| Reflections collected           | 11406         | 11965        |
| $R_{\text{int}}$                | 0.0458        | 0.0302       |
| $\theta$ Range ( $^\circ$ )     | 1.353–24.996  | 1.678–25.000 |
| $R_1 (I > 2\sigma(I))^a$        | 0.0511        | 0.0396       |
| $wR_2$ (all data) <sup>a</sup>  | 0.1325        | 0.1026       |

$$^aR_1 = \sum||F_o| - |F_c||/\sum|F_o|; wR_2 = \sum[w(F_o^2 - F_c^2)^2]/\sum[w(F_o^2)^2]^{1/2}$$

## 2.2 Selected bond lengths and angles

**Table S2** Selected bond lengths (nm) and angles ( $^\circ$ ) for **BiW<sub>9</sub>-Ni-SnR**

| Bond   | Length (nm) | Bond   | Length (nm) | Bond      | Length (nm) |
|--------|-------------|--------|-------------|-----------|-------------|
| W1–O12 | 0.1737(15)  | W5–O29 | 0.1858(16)  | W9–O1     | 0.1907(12)  |
| W1–O16 | 0.1772(15)  | W5–O4  | 0.1917(14)  | W9–O3     | 0.1908(14)  |
| W1–O11 | 0.1918(15)  | W5–O2  | 0.1932(13)  | W9–O17    | 0.1952(13)  |
| W1–O5  | 0.1949(14)  | W5–O6  | 0.1954(14)  | W9–O21    | 0.2269(13)  |
| W1–O19 | 0.2071(16)  | W5–O20 | 0.2232(14)  | Bi1–O21   | 0.2088(14)  |
| W1–O22 | 0.2188(14)  | W6–O28 | 0.1701(14)  | Bi1–O20   | 0.2141(13)  |
| W2–O14 | 0.1720(14)  | W6–O25 | 0.1856(14)  | Bi1–O22   | 0.2161(12)  |
| W2–O24 | 0.1796(14)  | W6–O30 | 0.1891(13)  | Sn1–O23   | 0.2050(15)  |
| W2–O23 | 0.1799(14)  | W6–O6  | 0.1937(14)  | Sn1–O24#3 | 0.2062(14)  |
| W2–O1  | 0.1963(14)  | W6–O33 | 0.1984(14)  | Sn1–O25#3 | 0.2071(14)  |
| W2–O18 | 0.2017(14)  | W6–O20 | 0.2243(13)  | Sn1–O26   | 0.2089(13)  |
| W2–O21 | 0.2218(12)  | W7–O31 | 0.1730(15)  | Sn1–C1    | 0.208(2)    |
| W3–O8  | 0.1707(15)  | W7–O15 | 0.1773(15)  | Sn1–O34   | 0.2152(15)  |
| W3–O33 | 0.1825 (14) | W7–O11 | 0.1903(15)  | Ni1–O3W   | 0.203(2)    |
| W3–O18 | 0.1862(13)  | W7–O30 | 0.1979(13)  | Ni1–O2W   | 0.203(2)    |
| W3–O3  | 0.1918(14)  | W7–O29 | 0.2026(17)  | Ni1–O16   | 0.2036(16)  |
| W3–O2  | 0.1931(13)  | W7–O20 | 0.2197(14)  | Ni1–O15   | 0.2050(16)  |
| W3–O21 | 0.2337(13)  | W8–O9  | 0.1739(15)  | Ni1–O14#3 | 0.2085(14)  |

|             |                 |             |                 |               |                 |
|-------------|-----------------|-------------|-----------------|---------------|-----------------|
| W4–O32      | 0.1725(15)      | W8–O26      | 0.1836(13)      | Ni1–O1W       | 0.2103(18)      |
| W4–O19      | 0.1860(16)      | W8–O5       | 0.1922(14)      | C3–O34        | 0.129(3)        |
| W4–O4       | 0.1894(15)      | W8–O7       | 0.1942(12)      | C3–O35        | 0.122(3)        |
| W4–O17      | 0.1898(14)      | W8–O10      | 0.1955(14)      | C1–C2         | 0.1507(10)      |
| W4–O7       | 0.1933(13)      | W8–O22      | 0.2229(14)      | C2–C3         | 0.1511(10)      |
| W4–O22      | 0.2222(13)      | W9–O13      | 0.1695(15)      |               |                 |
| W5–O27      | 0.1705(14)      | W9–O10      | 0.1887(14)      |               |                 |
| <b>Bond</b> | <b>Angle(°)</b> | <b>Bond</b> | <b>Angle(°)</b> | <b>Bond</b>   | <b>Angle(°)</b> |
| O11–W1–O5   | 161.3(6)        | O4–W5–O6    | 164.8(6)        | O1–W9–O17     | 161.8(6)        |
| O16–W1–O19  | 161.5(7)        | O27–W5–O20  | 171.1(6)        | O13–W9–O21    | 168.8(6)        |
| O5–W1–O22   | 74.5(5)         | O29–W5–O20  | 72.9(6)         | O1–W9–O21     | 73.1(5)         |
| O19–W1–O22  | 72.0(5)         | O6–W5–O20   | 76.4(5)         | O3–W9–O21     | 75.1(5)         |
| O23–W2–O18  | 160.4(6)        | O30–W6–O33  | 157.9(5)        | O21–Bi1–O20   | 90.0(5)         |
| O14–W2–O21  | 166.6(7)        | O28–W6–O20  | 173.4(6)        | O21–Bi1–O22   | 86.5(5)         |
| O1–W2–O21   | 73.4(5)         | O30–W6–O20  | 75.1(5)         | O20–Bi1–O22   | 84.0(5)         |
| O18–W2–O21  | 72.5(5)         | O6–W6–O20   | 76.4(6)         | O23–Sn1–C1    | 167.2(6)        |
| O18–W3–O2   | 158.5(6)        | O11–W7–O30  | 160.7(6)        | O24#3–Sn1–O34 | 169.6(6)        |
| O8–W3–O21   | 167.4(6)        | O31–W7–O20  | 161.9(7)        | O23–Sn1–O25#3 | 82.8(5)         |
| O18–W3–O21  | 72.4(5)         | O30–W7–O20  | 74.5(5)         | C1–Sn1–O34    | 83.0(6)         |
| O3–W3–O21   | 73.4(6)         | O29–W7–O20  | 70.8(5)         | O2W–Ni1–O16   | 174.3(8)        |
| O4–W4–O7    | 162.2(6)        | O5–W8–O10   | 159.0(6)        | O3W–Ni1–O15   | 173.8(9)        |
| O32–W4–O22  | 171.9(6)        | O9–W8–O22   | 170.3(6)        | O16–Ni1–O15   | 81.5(7)         |
| O19–W4–O22  | 75.1(6)         | O5–W8–O22   | 74.0(5)         | O2W–Ni1–O14#3 | 85.2(7)         |
| O7–W4–O22   | 74.4(5)         | O7–W8–O22   | 74.1(5)         |               |                 |

Symmetry transformations used to generate equivalent atoms: #3  $-x+2, -y+2, -z+1$

**Table S3** Selected bond lengths (nm) and angles (°) for **BiW<sub>9</sub>-Zn-SnR**

| <b>Bond</b> | <b>Length (nm)</b> | <b>Bond</b> | <b>Length (nm)</b> | <b>Bond</b> | <b>Length (nm)</b> |
|-------------|--------------------|-------------|--------------------|-------------|--------------------|
| W1–O14      | 0.1754(10)         | W5–O26      | 0.1862(10)         | W9–O11      | 0.1911(10)         |
| W1–O24      | 0.1815(9)          | W5–O33      | 0.1904 (10)        | W9–O10      | 0.1912(9)          |
| W1–O23      | 0.1825(9)          | W5–O30      | 0.1943(10)         | W9–O3       | 0.1932(9)          |
| W1–O11      | 0.1995(9)          | W5–O13      | 0.1997(9)          | W9–O22      | 0.2293(8)          |
| W1–O7       | 0.2035(9)          | W5–O21      | 0.2275(9)          | Bi1–O22     | 0.2109(8)          |
| W1–O22      | 0.2233(9)          | W6–O27      | 0.1707(10)         | Bi1–O21     | 0.2144(9)          |
| W2–O1       | 0.1728(10)         | W6–O31      | 0.1861 (9)         | Bi1–O20     | 0.2158(9)          |
| W2–O16      | 0.1764(11)         | W6–O17      | 0.1911(9)          | Sn1–O24#3   | 0.2047(10)         |

|             |                 |             |                 |                 |                 |
|-------------|-----------------|-------------|-----------------|-----------------|-----------------|
| W2-O12      | 0.1942(9)       | W6-O9       | 0.1917(9)       | Sn1-O23         | 0.2057(9)       |
| W2-O32      | 0.1967(9)       | W6-O30      | 0.1942(10)      | Sn1-O26         | 0.2092(10)      |
| W2-O18      | 0.2068(10)      | W6-O21      | 0.2248(10)      | Sn1-O25#3       | 0.2110 (9)      |
| W2-O20      | 0.2189 (9)      | W7-O19      | 0.1736(11)      | Sn1-C1          | 0.2112(13)      |
| W3-O8       | 0.1733(9)       | W7-O18      | 0.1880(9)       | Sn1-O34         | 0.2162(9)       |
| W3-O13      | 0.1851(9)       | W7-O9       | 0.1907(9)       | Zn1-O1W         | 0.2014(14)      |
| W3-O7       | 0.1874(10)      | W7-O3       | 0.1918 (9)      | Zn1-O3W         | 0.2071(13)      |
| W3-O10      | 0.1946(9)       | W7-O5       | 0.1965(9)       | Zn1-O16         | 0.2079(11)      |
| W3-O17      | 0.1953(10)      | W7-O20      | 0.2243(9)       | Zn1-O15         | 0.2090(10)      |
| W3-O22      | 0.2331(9)       | W8-O6       | 0.1715(9)       | Zn1-O14#1       | 0.2113(10)      |
| W4-O28      | 0.1713(9)       | W8-O25      | 0.1835(10)      | Zn1-O2W         | 0.2151(13)      |
| W4-O15      | 0.1768(11)      | W8-O32      | 0.1925(9)       | C3-O34          | 0.1279(16)      |
| W4-O12      | 0.1894(10)      | W8-O5       | 0.1964(10)      | C3-O35          | 0.1248(16)      |
| W4-O33      | 0.1993(9)       | W8-O2       | 0.1965(9)       | C1-C2           | 0.1536 (2)      |
| W4-O31      | 0.2081(10)      | W8-O20      | 0.2265(8)       | C2-C3           | 0.149 (2)       |
| W4-O21      | 0.2201(9)       | W9-O4       | 0.1724 (9)      |                 |                 |
| W5-O29      | 0.1715(9)       | W9-O2       | 0.1900(10)      |                 |                 |
| <b>Bond</b> | <b>Angle(°)</b> | <b>Bond</b> | <b>Angle(°)</b> | <b>Bond</b>     | <b>Angle(°)</b> |
| O24-W1-O7   | 161.1(4)        | O33-W5-O13  | 158.3(4)        | O11-W9-O3       | 161.4(4)        |
| O14-W1-O22  | 165.8(4)        | O29-W5-O21  | 173.1(4)        | O4-W9-O22       | 169.1(4)        |
| O11-W1-O22  | 73.6(3)         | O33-W5-O21  | 75.0(3)         | O11-W9-O22      | 73.8(3)         |
| O7-W1-O22   | 72.3(4)         | O30-W5-O21  | 75.6(4)         | O10-W9-O22      | 75.0(3)         |
| O12-W2-O32  | 161.3(4)        | O9-W6-O30   | 164.4(4)        | O22-Bi1-O21     | 90.0(3)         |
| O1-W2-O20   | 165.0(5)        | O27-W6-O21  | 171.6(4)        | O22-Bi1-O20     | 86.9(3)         |
| O32-W2-O20  | 74.8(3)         | O31-W6-O21  | 74.2(4)         | O21-Bi1-O20     | 83.3(3)         |
| O18-W2-O20  | 72.1(4)         | O30-W6-O21  | 76.2(4)         | O24#3-Sn1-C1    | 166.8(5)        |
| O13-W3-O10  | 159.2(4)        | O9-W7-O5    | 162.4(4)        | O23-Sn1-O34     | 169.4(4)        |
| O8-W3-O22   | 167.4(4)        | O19-W7-O20  | 172.2(4)        | O24#3-Sn1-O25#3 | 83.1(4)         |
| O7-W3-O22   | 72.8(3)         | O18-W7-O20  | 74.3(4)         | C1-Sn1-O34      | 82.7(5)         |
| O10-W3-O22  | 73.5(3)         | O5-W7-O20   | 75.5(4)         | O1W-Zn1-O15     | 172.2(6)        |
| O12-W4-O33  | 161.1(4)        | O32-W8-O2   | 159.3(4)        | O14#3-Zn1-O2W   | 171.6(5)        |
| O28-W4-O21  | 162.4(4)        | O6-W8-O20   | 170.3(4)        | O16-Zn1-O15     | 79.0(4)         |
| O33-W4-O21  | 75.0(3)         | O32-W8-O20  | 73.8(3)         | O3W-Zn1-O14#3   | 83.5(5)         |
| O31-W4-O21  | 71.4(4)         | O5-W8-O20   | 75.1(3)         |                 |                 |

Symmetry transformations used to generate equivalent atoms: #3 -x+1,-y+2,-z

## 2.3 Crystallographic structures

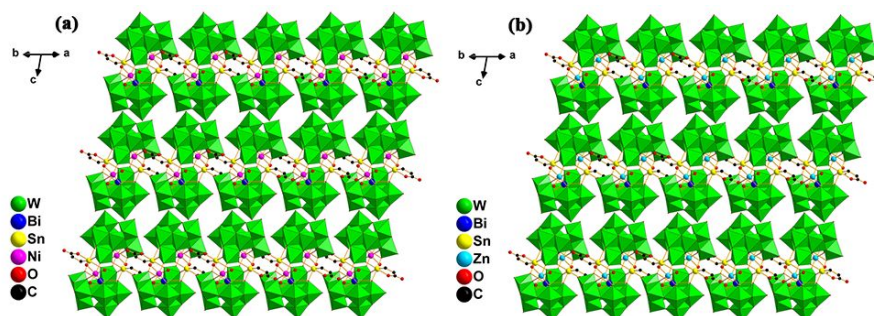

**Figure S1** The packing arrangements of the polyoxoanions in  $\text{BiW}_9\text{-Ni-SnR}$  (a) and  $\text{BiW}_9\text{-Zn-SnR}$  (b) (all H atoms, K and Na cations, and free water molecules are omitted for clarity)

## 2.4 Physical characterizations

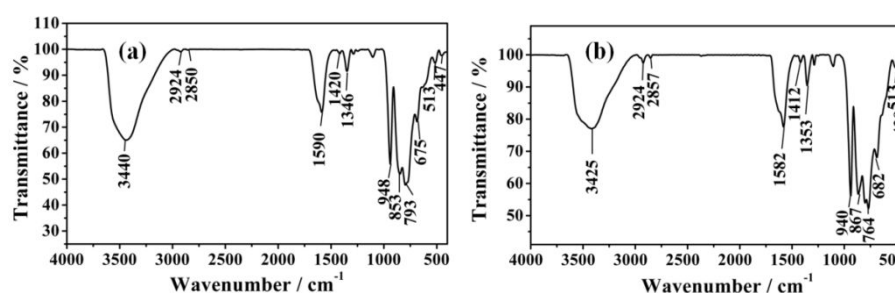

**Figure S2** IR spectra of  $\text{BiW}_9\text{-Ni-SnR}$  (a) and  $\text{BiW}_9\text{-Zn-SnR}$  (b)

The IR spectra were performed on a Bruker AXS TENSOR-27 spectrophotometer in the range 400–4000  $\text{cm}^{-1}$  (KBr pellets, POM: KBr = 1: 100). As shown in Figure S2, the vibration peaks between 950 and 670  $\text{cm}^{-1}$  are attributed to  $\nu(\text{W-O}_t)$ ,  $\nu(\text{Bi-O}_a)$ ,  $\nu(\text{W-O}_b)$  and  $\nu(\text{W-O}_c)$  ( $\text{O}_t$ ,  $\text{O}_a$ ,  $\text{O}_b$  and  $\text{O}_c$  are terminal, tetrahedral, edge- and corner-sharing oxygen atoms).<sup>4, 5</sup> The peaks at 513/513  $\text{cm}^{-1}$  and 447/439  $\text{cm}^{-1}$  are antisymmetric and symmetric stretching vibrations of Sn–C bonds.<sup>6</sup> The peaks appearing at around 1590/1582  $\text{cm}^{-1}$  and 1346/1353  $\text{cm}^{-1}$  correspond to  $\nu_{\text{as}}(\text{COO})$  and  $\nu_{\text{s}}(\text{COO})$  vibrations, respectively.<sup>7</sup> The broad bands of lattice water molecules are located at 3440/3425  $\text{cm}^{-1}$ . The peaks at 2924/2924 and 2850/2857  $\text{cm}^{-1}$  are attributed to the characteristic vibrations of the organic group ( $-\text{CH}_2$ ).<sup>8</sup>

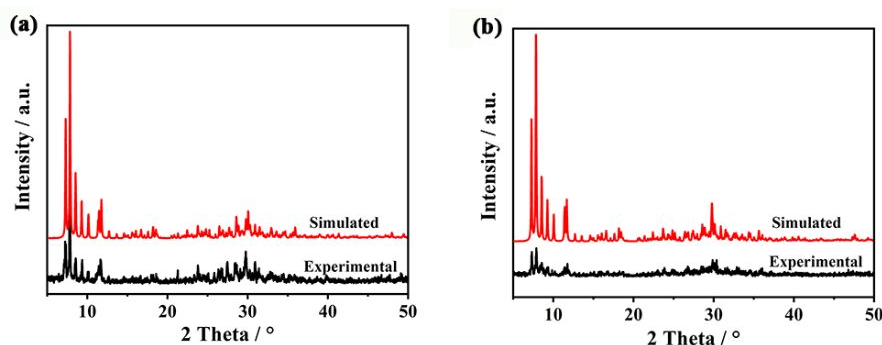

**Figure S3** The simulated and experimental XRPD patterns of  $\text{BiW}_9\text{-Ni-SnR}$  (a) and  $\text{BiW}_9\text{-Zn-SnR}$  (b)

X-ray powder diffraction (PXRD) data was conducted on a Bruker AXS D8 Advance diffractometer using Cu K $\alpha$  radiation ( $\lambda = 0.15418$  nm) in the  $2\theta$  range of 5–50°. The fitting XRPD data (Simulated) obtained from the analysis of single crystal test was calculated by software, which was compared with the actual experimental values (Experimental). It can be seen from Figure S3 that the simulated and experimental values of **BiW<sub>9</sub>-Ni-SnR** (a)/**BiW<sub>9</sub>-Zn-SnR** (b) are in good agreement with each other, indicating that the two compounds are pure phase. Some differences in diffraction peak intensity may be due to the destruction of crystal water and the change of surface morphology.

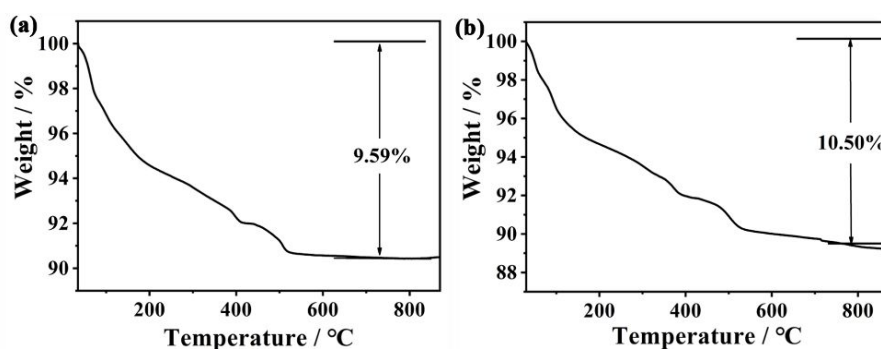

**Figure S4** TG curves of **BiW<sub>9</sub>-Ni-SnR** (a) and **BiW<sub>9</sub>-Zn-SnR** (b)

Thermogravimetric (TG) measurement was measured on a Pyris Diamond TG-GTA thermal analyzer under air atmosphere with a heating rate of 10 °C min<sup>-1</sup>. As presented in Figure S4, the TG curves of the two POMs show a similar three-step continuous weight loss from 30 to 800 °C. The total weight losses are 9.59% and 10.50% for **BiW<sub>9</sub>-Ni-SnR** (a) and **BiW<sub>9</sub>-Zn-SnR** (b), which correspond with the theoretical values of 10.09% and 10.32%, respectively. As can be seen from Figure S4a and b, the first weight losses of 5.95% (calcd 5.94%) and 6.49% (calcd 6.19%) in the ranges of 36–252 and 30–303 °C are ascribed to the loss of crystalline water molecules, respectively. The last two steps of weight losses of 3.64% and 4.01% (the calculated values are 4.15% and 4.13%) can be attributed to the loss of coordination water molecules and CH<sub>2</sub>CH<sub>2</sub>COO groups in the temperature range of 252–780 °C and 303–770 °C for **BiW<sub>9</sub>-Ni-SnR** and **BiW<sub>9</sub>-Zn-SnR**, respectively. It is obvious that the actual weight loss of **BiW<sub>9</sub>-Ni-SnR** is lower than the theoretical weight loss, which may be caused by the partial loss of CH<sub>2</sub>CH<sub>2</sub>COO.

### 3. Corrosion inhibition performance



**Table S4** Corrosion parameters obtained from weight loss measurement for 20<sup>#</sup> carbon steel immersed in 0.5 M HCl solution containing **Na-SbW<sub>9</sub>** or **Na-BiW<sub>9</sub>** for 6 and 10 h at 301 K

| Inhibitor                 | Inhibitor concentration (mg L <sup>-1</sup> ) | Time (h) | $\Delta m$ (g) | $C_R$ (mg cm <sup>-2</sup> h <sup>-1</sup> ) | IE <sub>w</sub> (%) |
|---------------------------|-----------------------------------------------|----------|----------------|----------------------------------------------|---------------------|
| <b>Na-SbW<sub>9</sub></b> | 300                                           | 6        | 0.0509         | 0.673                                        | 2.1                 |
|                           |                                               | 10       | 0.0897         | 0.712                                        | 1.6                 |
|                           | 500                                           | 6        | 0.0538         | 0.713                                        | –                   |
| <b>Na-BiW<sub>9</sub></b> | 300                                           | 6        | 0.0495         | 0.655                                        | 5.0                 |
|                           |                                               | 10       | 0.0889         | 0.706                                        | –                   |
|                           | 500                                           | 6        | 0.0483         | 0.639                                        | 15.0                |

**Table S5** Corrosion parameters derived from potentiodynamic polarization curves of 20<sup>#</sup> carbon steel in 1.0 M and 2.0 M HCl solutions in the absence (blank) and in the presence of inhibitors at 298 K

| Inhibitor                     | HCl solution concentration (M) | $\beta_a$ (mV dec <sup>-1</sup> ) | $\beta_c$ (mV dec <sup>-1</sup> ) | $E_{corr}$ (V vs. SCE) | $I_{corr}$ (μA cm <sup>-2</sup> ) | IE <sub>i</sub> (%) |
|-------------------------------|--------------------------------|-----------------------------------|-----------------------------------|------------------------|-----------------------------------|---------------------|
| Blank                         | 1.0                            | 85.7                              | -115.7                            | -0.202                 | 509.8                             | –                   |
|                               | 2.0                            | 82.4                              | -107.1                            | -0.180                 | 566.1                             | –                   |
| <b>SbW<sub>9</sub>-Mn-SnR</b> | 1.0                            | 119.4                             | -141.7                            | -0.164                 | 52.4                              | 89.7                |
|                               | 2.0                            | 74.3                              | -134.6                            | -0.166                 | 70.0                              | 87.6                |
| <b>SbW<sub>9</sub>-Co-SnR</b> | 1.0                            | 83.2                              | -134.4                            | -0.162                 | 58.8                              | 88.5                |
|                               | 2.0                            | 89.0                              | -133.5                            | -0.155                 | 66.5                              | 88.2                |
| <b>SbW<sub>9</sub>-Ni-SnR</b> | 1.0                            | 87.0                              | -134.5                            | -0.159                 | 60.1                              | 88.2                |
|                               | 2.0                            | 110.5                             | -135.3                            | -0.161                 | 60.9                              | 89.2                |
| <b>SbW<sub>9</sub>-Zn-SnR</b> | 1.0                            | 90.4                              | -136.8                            | -0.155                 | 56.5                              | 88.9                |
|                               | 2.0                            | 100.5                             | -136.8                            | -0.165                 | 63.6                              | 88.8                |
| <b>BiW<sub>9</sub>-Mn-SnR</b> | 1.0                            | 90.9                              | -135.9                            | -0.167                 | 58.2                              | 88.6                |
|                               | 2.0                            | 85.1                              | -131.8                            | -0.160                 | 69.8                              | 87.7                |
| <b>BiW<sub>9</sub>-Co-SnR</b> | 1.0                            | 90.6                              | -135.1                            | -0.173                 | 56.7                              | 88.9                |
|                               | 2.0                            | 88.7                              | -136.0                            | -0.165                 | 66.8                              | 88.2                |
| <b>BiW<sub>9</sub>-Ni-SnR</b> | 1.0                            | 90.3                              | -132.4                            | -0.168                 | 55.3                              | 89.2                |
|                               | 2.0                            | 89.5                              | -135.5                            | -0.171                 | 63.2                              | 88.8                |

|                                                                      |     |       |        |        |       |      |
|----------------------------------------------------------------------|-----|-------|--------|--------|-------|------|
| <b>BiW<sub>9</sub>-Zn-SnR</b>                                        | 1.0 | 101.2 | -132.0 | -0.168 | 47.2  | 90.7 |
|                                                                      | 2.0 | 73.1  | -138.3 | -0.156 | 69.0  | 87.8 |
| <b>Na-SbW<sub>9</sub></b>                                            | 1.0 | 59.3  | -114.8 | -0.197 | 192.5 | 62.2 |
|                                                                      | 2.0 | 63.7  | -120.2 | -0.144 | 163.9 | 71.0 |
| <b>Na-BiW<sub>9</sub></b>                                            | 1.0 | 72.2  | -108.1 | -0.209 | 154.6 | 69.7 |
|                                                                      | 2.0 | 64.6  | -114.9 | -0.150 | 194.7 | 65.6 |
| Cl <sub>3</sub> Sn(CH <sub>2</sub> ) <sub>2</sub> COOCH <sub>3</sub> | 1.0 | 103.6 | -134.1 | -0.181 | 77.3  | 84.8 |
|                                                                      | 2.0 | 74.4  | -134.3 | -0.145 | 70.2  | 87.6 |

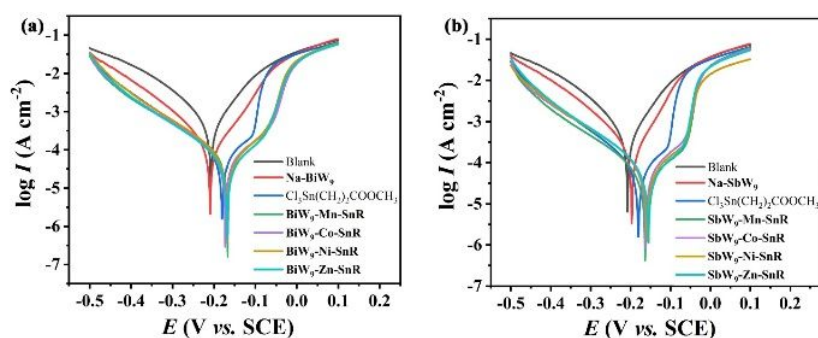

**Figure S5** Potentiodynamic polarization curves for 20<sup>#</sup> carbon steel in 1.0 M HCl solution containing 150 mg L<sup>-1</sup> of **Na-SbW<sub>9</sub>/Na-BiW<sub>9</sub>**, Cl<sub>3</sub>Sn(CH<sub>2</sub>)<sub>2</sub>COOCH<sub>3</sub>, **SbW<sub>9</sub>-TM-SnR/BiW<sub>9</sub>-TM-SnR** (TM = Mn, Co, Ni, Zn) corrosion inhibitor (a, b) at 298K. 1.0 M HCl solution was used as the blank

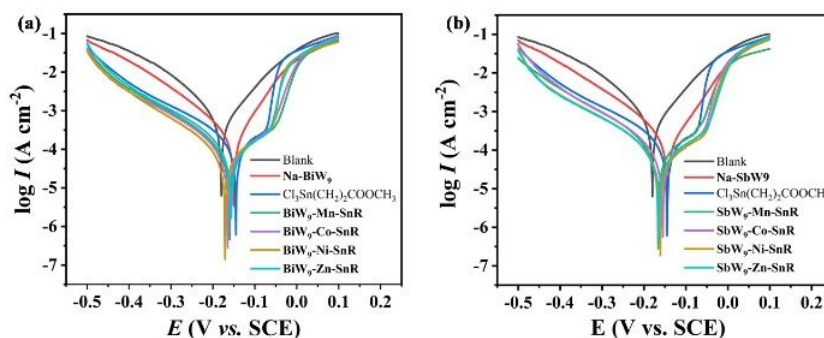

**Figure S6** Potentiodynamic polarization curves for 20<sup>#</sup> carbon steel in 2.0 M HCl solution containing 150 mg L<sup>-1</sup> of **Na-SbW<sub>9</sub>/Na-BiW<sub>9</sub>**, Cl<sub>3</sub>Sn(CH<sub>2</sub>)<sub>2</sub>COOCH<sub>3</sub>, **SbW<sub>9</sub>-TM-SnR/BiW<sub>9</sub>-TM-SnR** (TM = Mn, Co, Ni, Zn) corrosion inhibitor (a, b) at 298K. 2.0 M HCl solution was used as the blank

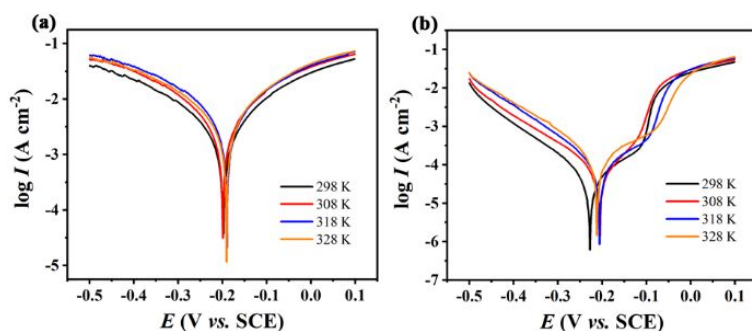

**Figure S7** Potentiodynamic polarization curves for 20<sup>#</sup> carbon steel in 0.5 M HCl solution in the absence (a) and presence of **SbW<sub>9</sub>-Mn-SnR** (b) at different temperatures

**Table S6** Corrosion parameters derived from potentiodynamic polarization curves of 20<sup>#</sup> carbon steel in 0.5 M HCl solution in the absence (blank) and presence of **SbW<sub>9</sub>-Mn-SnR** at different temperatures

| Inhibitor                     | Temperature<br>(K) | $\beta_a$<br>(mV dec <sup>-1</sup> ) | $\beta_c$<br>(mV dec <sup>-1</sup> ) | $E_{\text{corr}}$<br>(V vs. SCE) | $I_{\text{corr}}$<br>( $\mu\text{A cm}^{-2}$ ) | $\text{IE}_i$<br>(%) |
|-------------------------------|--------------------|--------------------------------------|--------------------------------------|----------------------------------|------------------------------------------------|----------------------|
| Blank                         | 298                | 88.8                                 | -135.6                               | -0.233                           | 1096.5                                         | —                    |
|                               | 308                | 119.6                                | -149.5                               | -0.199                           | 1216.2                                         | —                    |
|                               | 318                | 130.5                                | -143.5                               | -0.190                           | 1391.3                                         | —                    |
|                               | 328                | 108.6                                | -133.4                               | -0.191                           | 1584.9                                         | —                    |
| <b>SbW<sub>9</sub>-Mn-SnR</b> | 298                | 80.9                                 | -75.1                                | -0.228                           | 43.8                                           | 96.0                 |
|                               | 308                | 76.7                                 | -119.7                               | -0.205                           | 61.0                                           | 94.3                 |
|                               | 318                | 85.8                                 | -72.3                                | -0.206                           | 86.8                                           | 93.8                 |
|                               | 328                | 89.2                                 | -69.3                                | -0.212                           | 122.2                                          | 92.3                 |

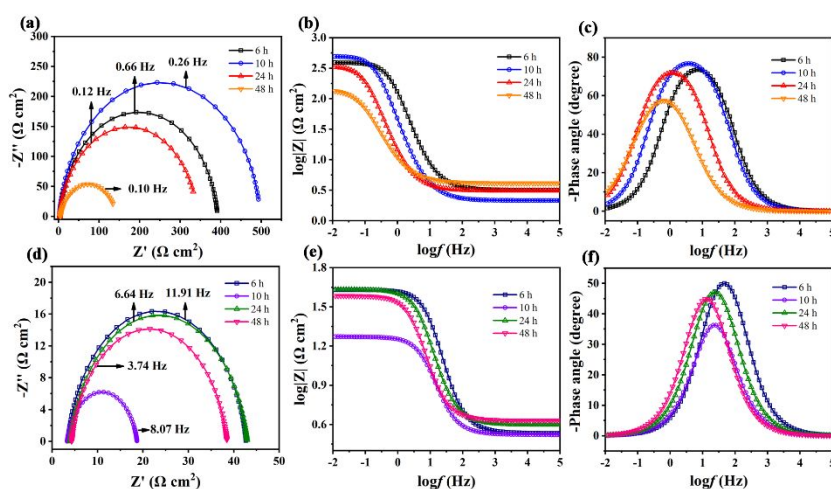

**Figure S8** Nyquist plots, Bode Modulus plots and Bode Phase plots of 20<sup>#</sup> carbon steel immersed in 0.5 M HCl solution in presence of 150 mg L<sup>-1</sup> **SbW<sub>9</sub>-Mn-SnR** inhibitor (a, b, c) and the absence (d, e, f) for 6, 10, 24, 48 h at room temperature, respectively (Solid line shows fitted results)

#### 4. Adsorption isotherm

The adsorption of corrosion inhibitors on the metal surface was determined by the use of different isotherms i.e., Frumkin, Freundlich, Temkin, Flory-Huggins and El-Awady adsorption isotherms. The following equations represented the adsorption isotherms:

Frumkin adsorption isotherm:

$$K_{ads} C_{inh} = \left( \frac{\theta}{1-\theta} \right) \exp(2\alpha\theta)$$

Freundlich adsorption isotherm:

$$\log K_{ads} + x \log C_{inh} = \ln \theta$$

Temkin adsorption isotherm:

$$K_{ads} C_{inh} = \exp(-2\alpha\theta)$$

El-Awady adsorption isotherm:

$$\ln K_{ads} + y \ln C_{inh} = \ln \left( \frac{\theta}{1-\theta} \right)$$

Flory-Huggins adsorption isotherm:

$$\ln z K_{ads} + z \ln(1-\theta) = \ln \left( \frac{\theta}{C_{inh}} \right)$$

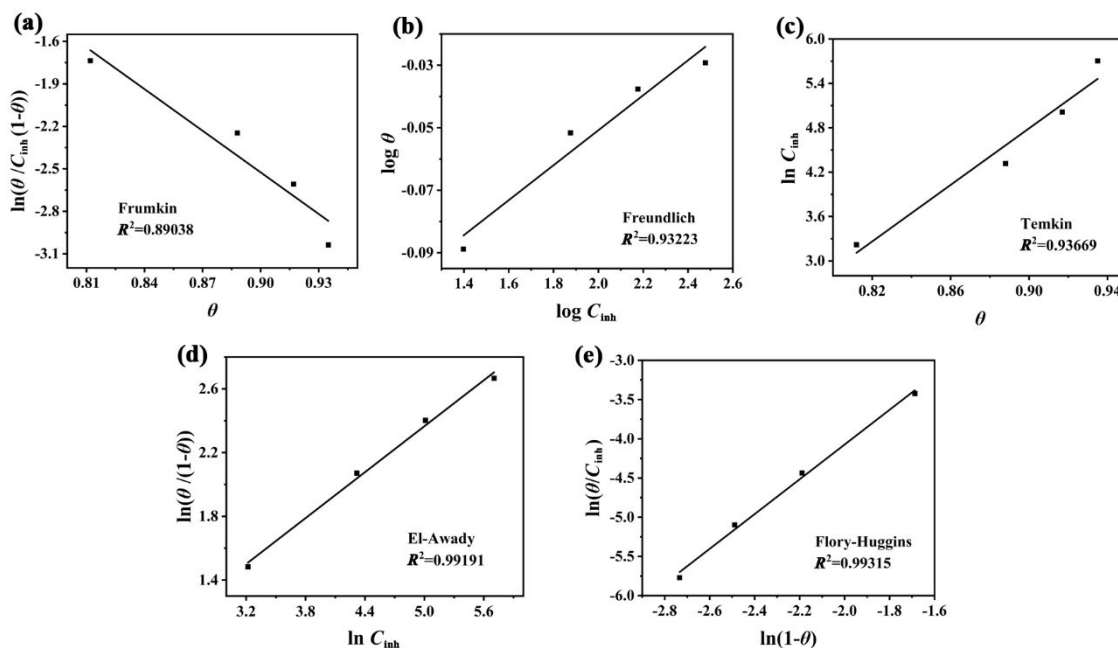

**Figure S9** (a) Frumkin, (b) Freundlich, (c) Temkin, (d) El-Awady and (e) Flory-Huggins adsorption isotherms of SbW<sub>9</sub>-Mn-SnR on 20<sup>#</sup> carbon steel in 0.5 M HCl solution at 298 K

## 5. Stability analysis of corrosion inhibitor

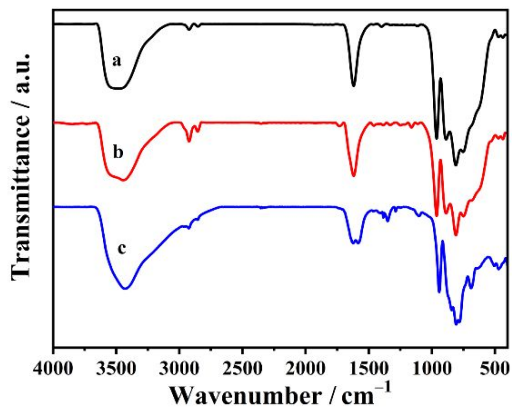

**Figure S10** IR spectra of the solid sample obtained by recrystallization from the filtrate of 0.5 M HCl solution containing 150 mg L<sup>-1</sup> **SbW<sub>9</sub>-Mn-SnR** and excessive Fe powder for 6 h (a), the solid sample obtained by recrystallization after dissolving **SbW<sub>9</sub>-Mn-SnR** in 0.5 M HCl solution for 6 h (b), and pure crystal **SbW<sub>9</sub>-Mn-SnR** (c)

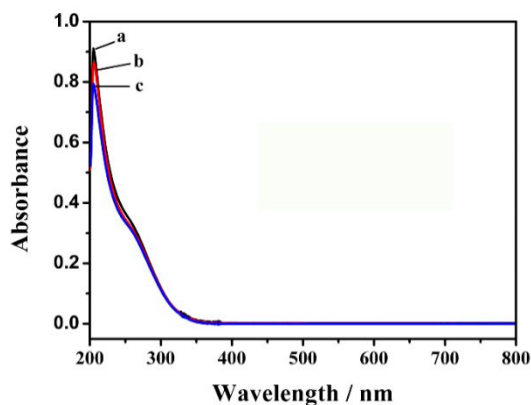

**Figure S11** UV-vis absorption spectra of **SbW<sub>9</sub>-Mn-SnR** dissolved in 0.5 M HCl solution for 0 h (a), 6 h (b), and 6 h with adding Fe powder (c)

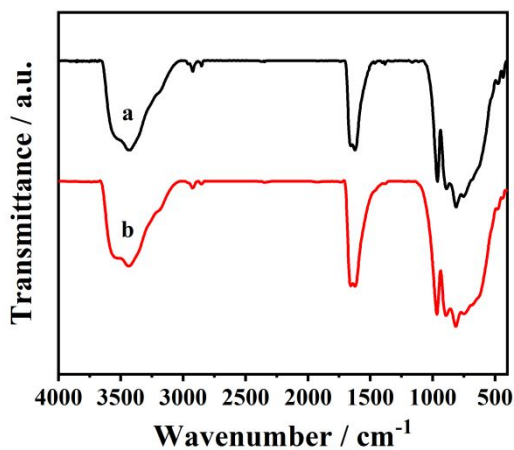

**Figure S12** IR spectra of the solid sample obtained by recrystallization from the filtrate of 1.0 M (a) and 2.0 M (b) HCl solutions containing **SbW<sub>9</sub>-Mn-SnR** and excessive Fe powder for 6 h

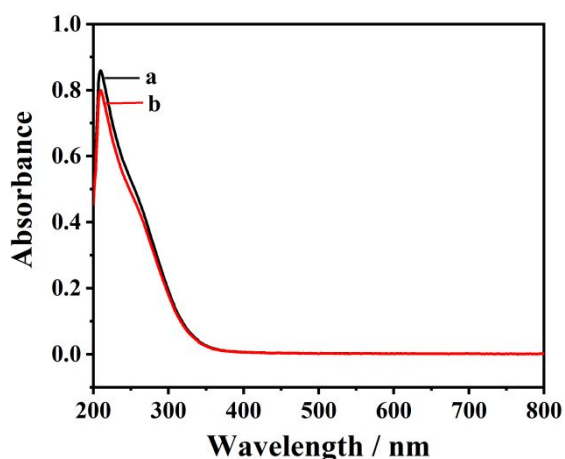

**Figure S13** UV-vis absorption spectra of **SbW<sub>9</sub>-Mn-SnR** dissolved in 1.0 M (a) and 2.0 M (b) HCl solutions for 6 h with adding Fe powder

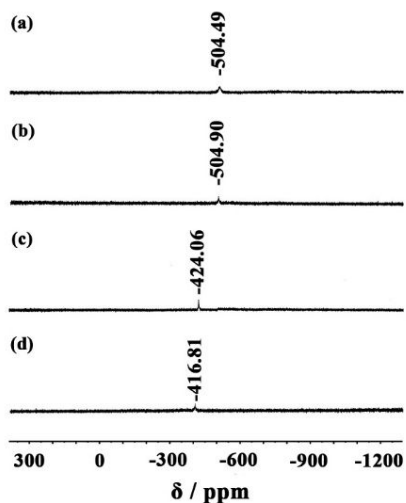

**Figure S14** <sup>119</sup>Sn NMR spectra of **SbW<sub>9</sub>-Co-SnR** in 0.5 M (a), 1.0 M (b) and 2.0 M (c) HCl solutions and <sup>119</sup>Sn NMR spectrum of Cl<sub>3</sub>Sn(CH<sub>2</sub>)<sub>2</sub>COOCH<sub>3</sub> (d)

## REFERENCES

- (1) Wang, H. D.; Wang, X. F.; Su, F.; Li, J. S.; Zhang, L. C.; Sang, X. J.; Zhu, Z. M., Carboxyethyltin and transition metal co-functionalized tungstoantimonates composited with polypyrrole for enhanced electrocatalytic methanol oxidation. *Dalton Trans.* **2019**, *48*, 2977–2987. DOI 10.1039/c8dt05118f.
- (2) Wang, Z. J.; Zhang, L. C.; Zhu, Z. M.; Chen, W. L.; You, W. S.; Wang, E. B., Two new sandwich-type tungstobismuthates constructed from trivacant Keggin units, estertin and transition metals. *Inorg. Chem. Commun.* **2012**, *17*, 151–154. DOI 10.1016/j.inoche.2011.12.038.
- (3) Sheldrick, G. M.; Crystal structure refinement with SHELXL. *Acta Cryst.* **2015**, *C71*, 3–8. DOI 10.1107/S2053229614024218.
- (4) Sun, C. Y.; Liu, S. X.; Wang, C. L.; Xie, L. H.; Zhang, C. D.; Gao, B.; Wang, E. B., Reactions of trivacant lone-paircontaining tungstobismutate and electrochemical behaviors of its sandwich-type products. *J. Coord. Chem.* **2007**, *60*, 567–579. DOI 10.1080/00958970600894972.
- (5) Alizadeh, M. H.; Mohadeszadeh, M., Sandwich-type uranium-substituted of bismuthotungstate: synthesis and structure determination of  $(\text{Na}(\text{UO}_2)_2(\text{H}_2\text{O})_4(\text{BiW}_9\text{O}_{33})_2)^{13-}$ . *J. Cluster Sci.* **2008**, *19*, 435–443. DOI 10.1007/s10876-008-0184-7.
- (6) Khawar Raufa, M.; Adeel Saeeda, M.; Imtiaz-ud-Dina; Bolteb, M.; Badshaha, A.; Mirza, B., Synthesis, characterization and biological activities of some new organotin(IV) derivatives: crystal structure of  $((\text{SnPh}_3)(\text{OCC}_6\text{H}_4\text{OH}))$  and  $((\text{SnMe}_3)_2(\text{OOC})_2\text{C}_6\text{Cl}_4(\text{DMSO})_2)$ . *J. Organomet. Chem.* **2008**, *693*, 3043–3048. DOI 10.1016/j.jorganchem.2008.06.027.
- (7) Deacon, G. B.; Phillips, R. J., Relationships between the carbon-oxygen stretching frequencies of carboxylato complexes and the type of carboxylate coordination. *Coord. Chem. Rev.* **1980**, *33*, 227–250. DOI 10.1016/S0010-8545(00)80455-5.
- (8) Yang, G. Y.; Sevov, S. C.,  $[\text{Co}(\text{en})_3][\text{B}_2\text{P}_3\text{O}_{11}(\text{OH})_2]$ : A novel borophosphate templated by a transition-metal complex. *Inorg. Chem.* **2001**, *40*, 2214–2215. DOI 10.1021/ic001397a.
